# Supplementary material for: Organosilicon uptake by biological membranes
Source: PubMed Central journal article supplement (PMC8190035; doi:10.1038/s42003-021-02155-5), 2021-06-09
Supplement: 42003_2021_2155_MOESM3_ESM.pdf [file 42003_2021_2155_MOESM3_ESM.pdf]

## Description of Additional Supplementary Files

**File name:** Supplementary Data 1

**Description:** Data to Figure 2: a) Raman spectra, b) Raman images, c) AES-SEM images

**File name:** Supplementary Data 2

**Description:** Data to Figure 3: a) XPS spectra, b) XPS zoom in, c) IR spectra
